# Supplementary material for: Regulators of plant biomass degradation in ascomycetous fungi
Source: PubMed Central journal article supplement (PMC5468973; doi:10.1186/s13068-017-0841-x), 2017-06-12

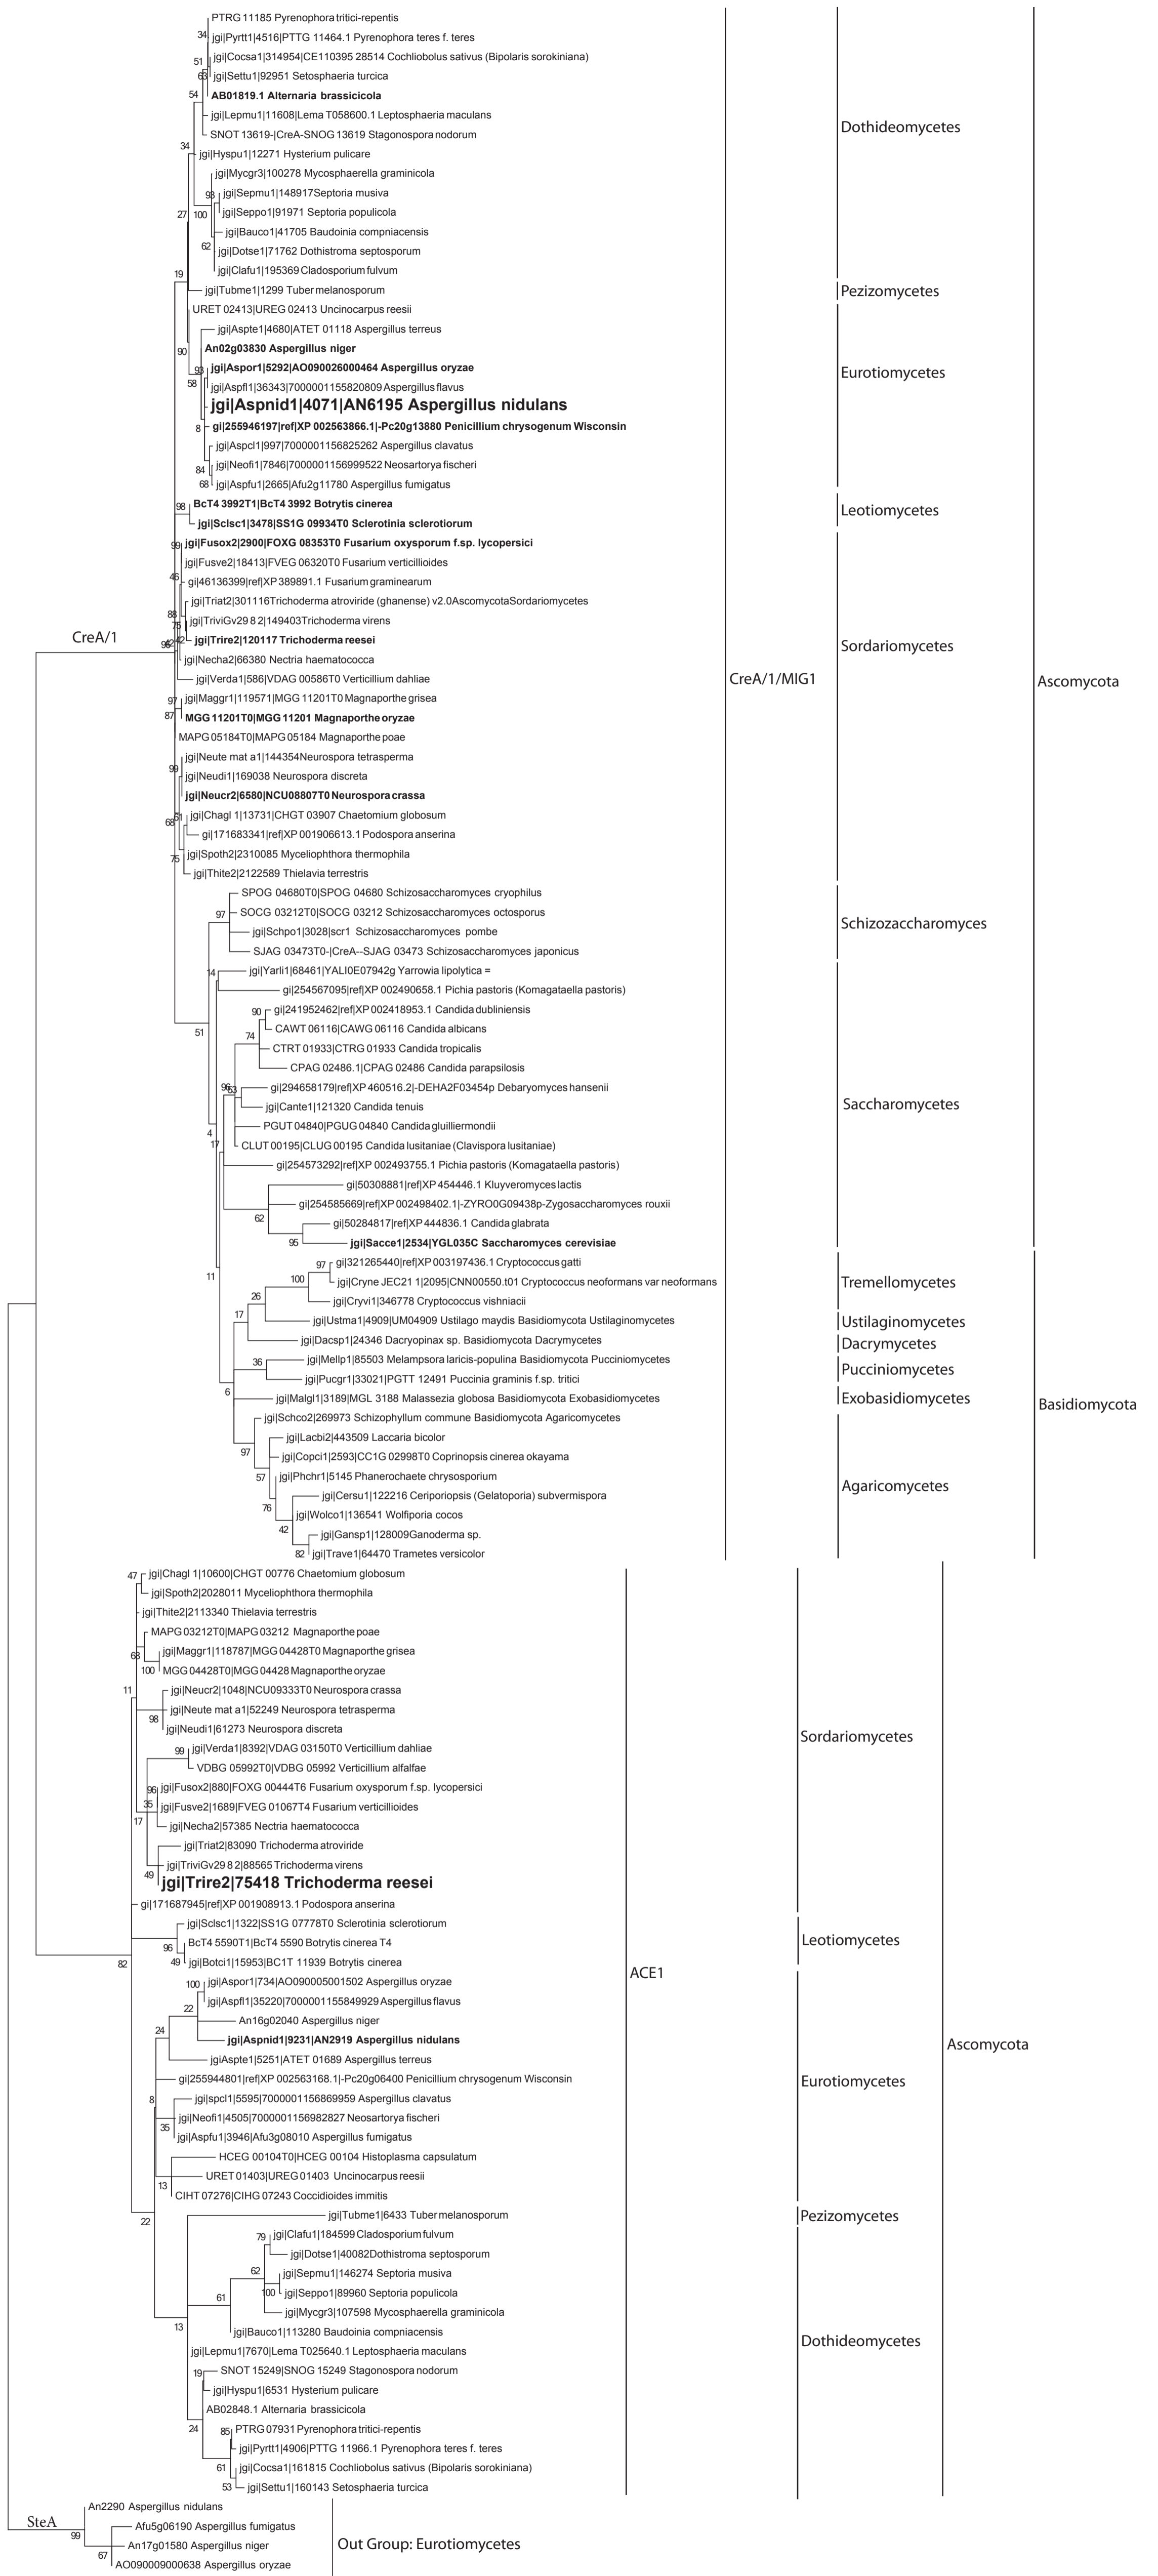

Supplement: 13068_2017_841_MOESM3_ESM.pdf [file 13068_2017_841_MOESM3_ESM.pdf]
