# Supplementary material for: Regulators of plant biomass degradation in ascomycetous fungi
Source: PubMed Central journal article supplement (PMC5468973; doi:10.1186/s13068-017-0841-x), 2017-06-12
Supplement: 13068_2017_841_MOESM4_ESM.pdf [file 13068_2017_841_MOESM4_ESM.pdf]

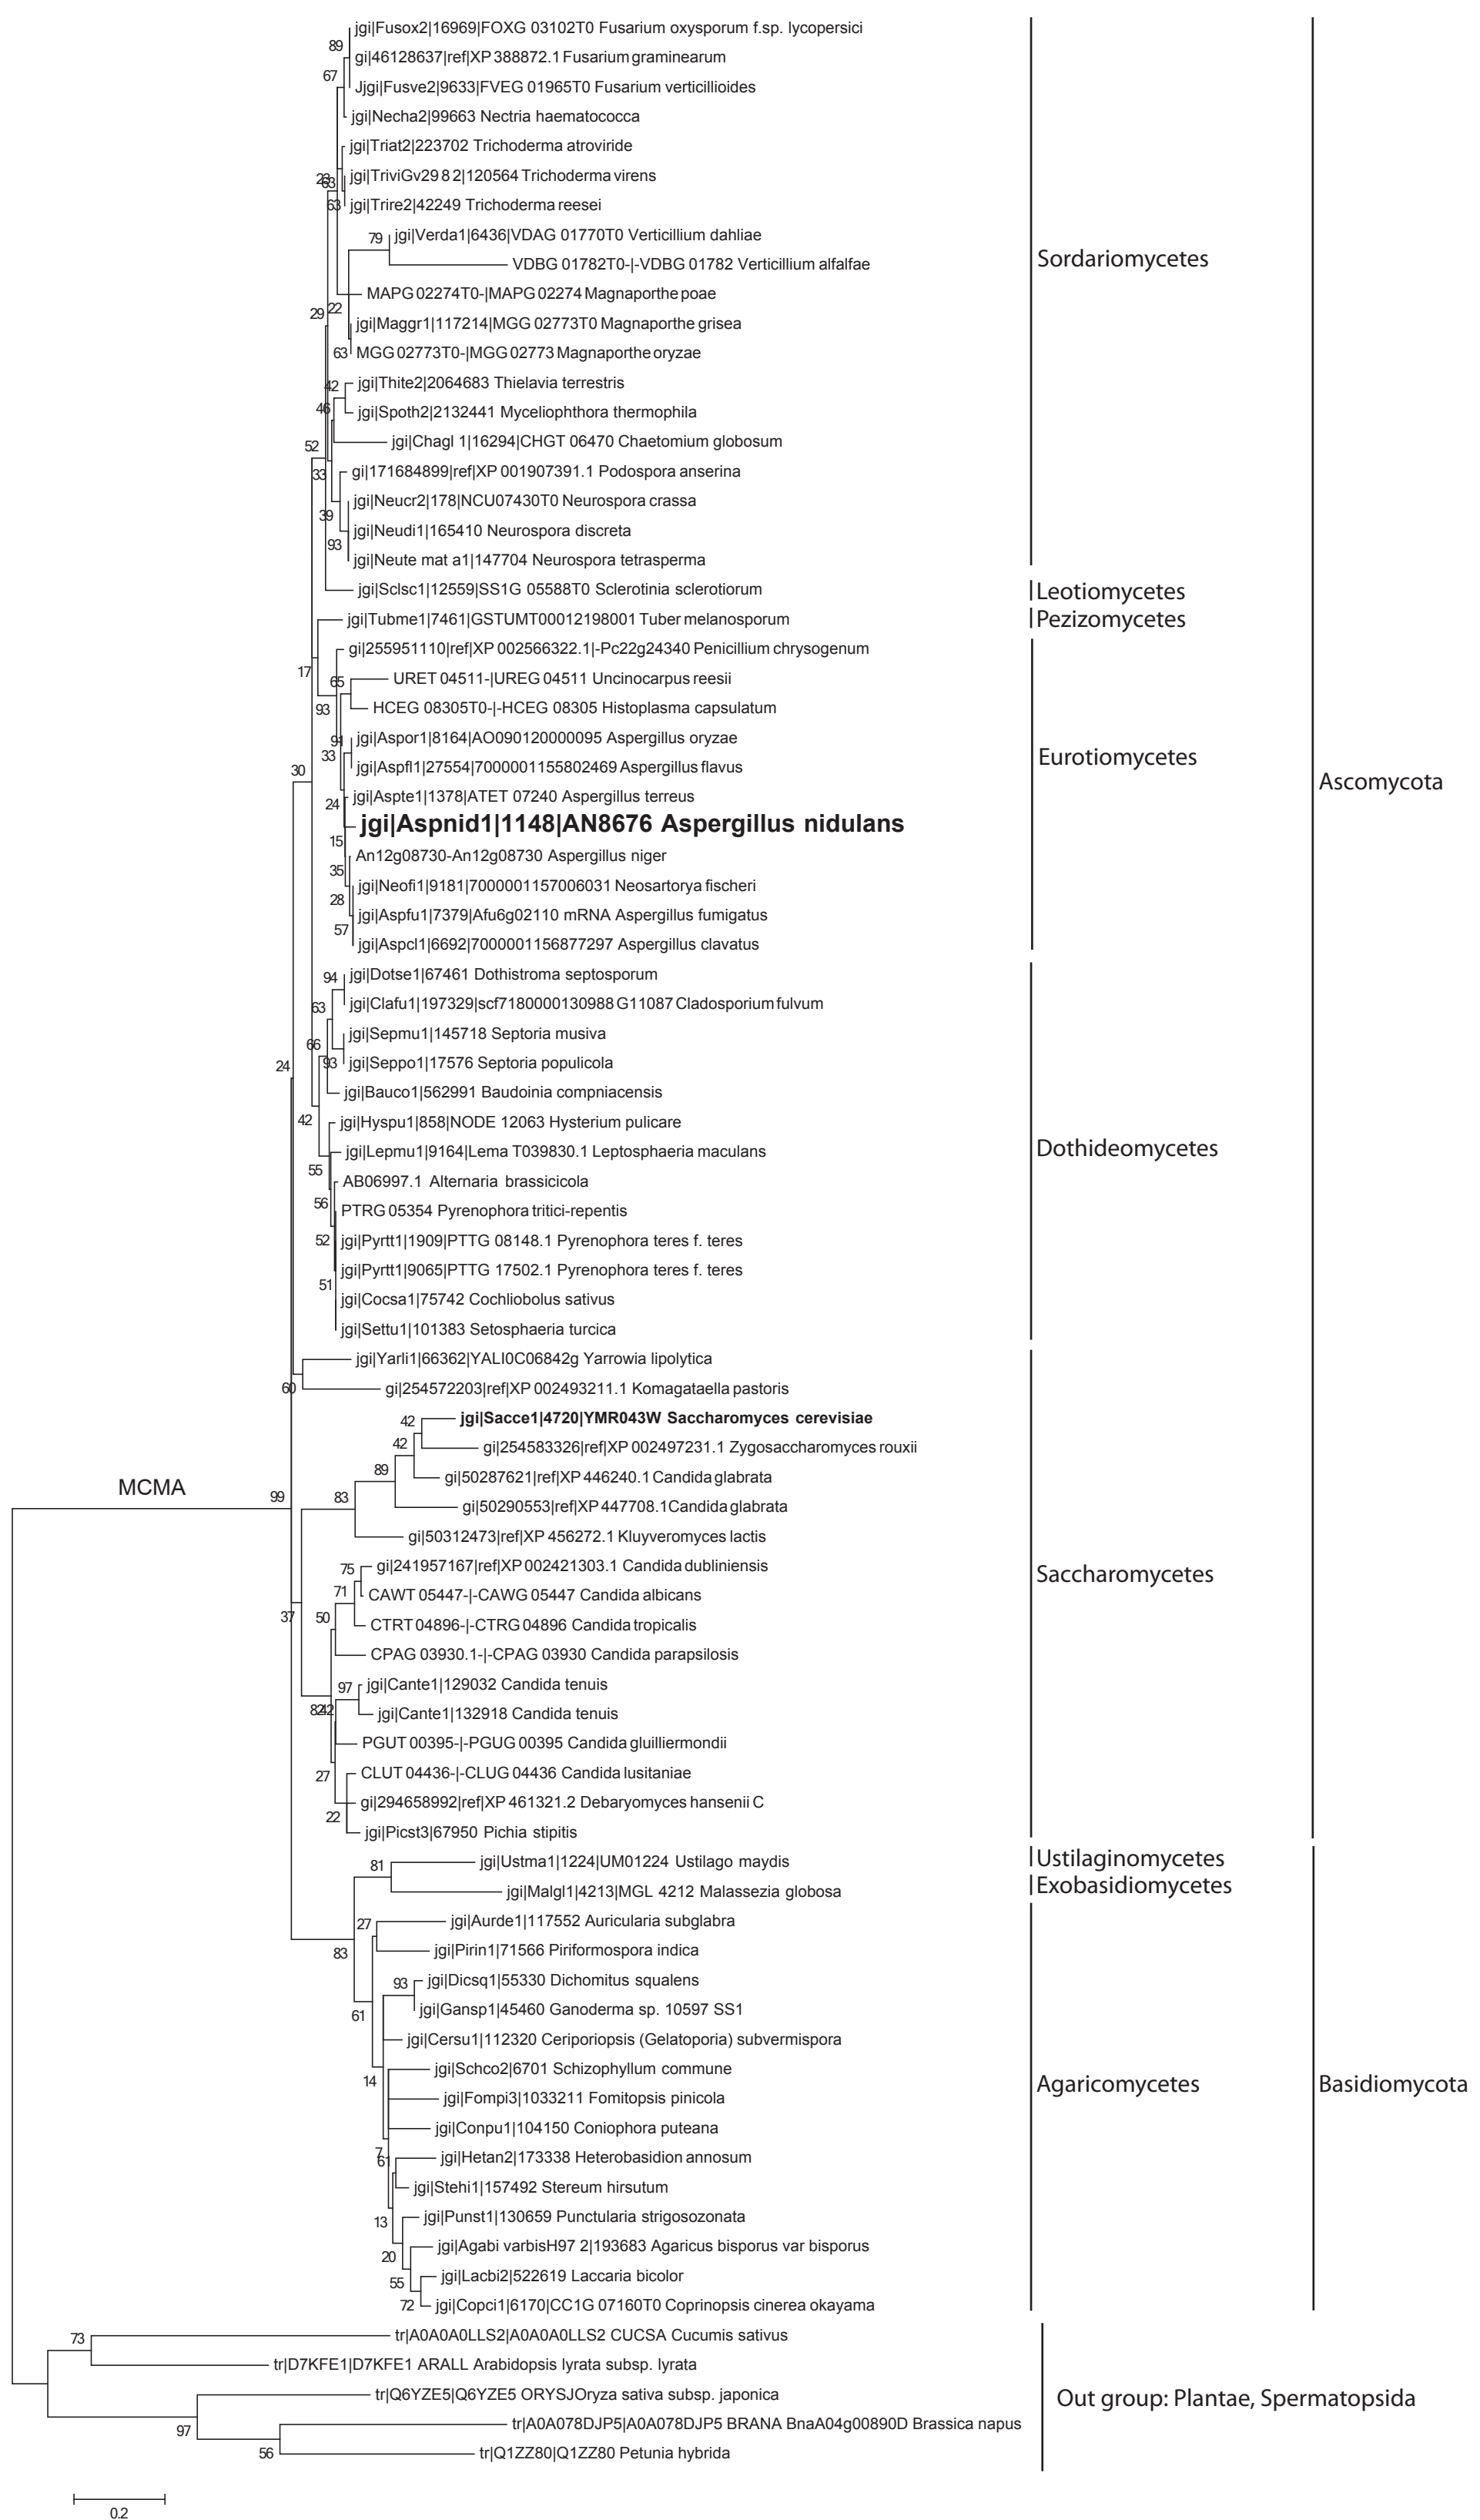

**Additional File 4. Maximum likelihood tree of MADS BOX (McmA) Transcription Factors (TFs).**

In bold are the species for which the TF has been characterized, while in bold and larger font are the species in which the TF was first discovered.
